# Supplementary material
Source: publisher site journal article supplement (https://www.spandidos-publications.com/5038/downloadSupplementary)
Supplement: Supplementary file 1 [file downloadSupplementary]

## Sheet: Supplementary Table S1
Table SI. LUAD case-IDs from TCGA database.
TCGA ID	Age	Sex	Stage	T	M	N
TCGA-L4-A4E5	<=65	FEMALE	Stage I	T1	M0	N0
TCGA-50-6673	<=65	MALE	Stage I	T1	M0	N0
TCGA-MP-A4TA	<=65	FEMALE	Stage I	T1	M0	N0
TCGA-44-6145	<=65	FEMALE	Stage I	T1	M0	N0
TCGA-44-3918	<=65	FEMALE	Stage I	T1	M0	N0
TCGA-49-4486	<=65	FEMALE	Stage I	T1	M0	N0
TCGA-MP-A4T2	<=65	FEMALE	Stage I	T1	M0	N0
TCGA-49-4487	<=65	FEMALE	Stage I	T1	M0	N0
TCGA-49-4514	<=65	FEMALE	Stage I	T1	M0	N0
TCGA-44-2661	<=65	FEMALE	Stage I	T1	M0	N0
TCGA-55-6980	<=65	FEMALE	Stage I	T1	M0	N0
TCGA-64-1681	<=65	FEMALE	Stage I	T1	M0	N0
TCGA-35-4122	<=65	FEMALE	Stage I	T1	M0	N0
TCGA-78-8655	<=65	FEMALE	Stage I	T1	M0	N0
TCGA-NJ-A4YF	>65	FEMALE	Stage I	T1	M0	N0
TCGA-67-3771	>65	FEMALE	Stage I	T1	M0	N0
TCGA-44-A47G	>65	FEMALE	Stage I	T1	M0	N0
TCGA-35-4123	>65	FEMALE	Stage I	T1	M0	N0
TCGA-38-7271	>65	FEMALE	Stage I	T1	M0	N0
TCGA-44-2655	>65	FEMALE	Stage I	T1	M0	N0
TCGA-91-6835	>65	FEMALE	Stage I	T1	M0	N0
TCGA-44-3919	unknow	FEMALE	Stage I	T1	M0	N0
TCGA-78-7162	<=65	MALE	Stage I	T1	M0	N0
TCGA-80-5608	<=65	MALE	Stage I	T1	M0	N0
TCGA-L4-A4E6	<=65	MALE	Stage I	T1	M0	N0
TCGA-50-5935	<=65	MALE	Stage I	T1	M0	N0
TCGA-50-5942	<=65	MALE	Stage I	T1	M0	N0
TCGA-44-2664	<=65	MALE	Stage I	T1	M0	N0
TCGA-05-4389	>65	MALE	Stage I	T1	M0	N0
TCGA-73-4662	>65	MALE	Stage I	T1	M0	N0
TCGA-86-8076	>65	MALE	Stage I	T1	M0	N0
TCGA-55-6987	>65	MALE	Stage I	T1	M0	N0
TCGA-50-7109	>65	MALE	Stage I	T1	M0	N0
TCGA-83-5908	>65	MALE	Stage I	T1	M0	N0
TCGA-55-1595	>65	MALE	Stage I	T1	M0	N0
TCGA-67-3770	>65	MALE	Stage I	T1	M0	N0
TCGA-64-1676	<=65	FEMALE	Stage I	T1	M0	N0
TCGA-95-7944	<=65	FEMALE	Stage I	T1	M0	N0
TCGA-MP-A4TH	<=65	FEMALE	Stage I	T1	M0	N0
TCGA-86-A456	<=65	FEMALE	Stage I	T1	M0	N0
TCGA-95-7947	>65	FEMALE	Stage I	T1	M0	N0
TCGA-99-AA5R	>65	FEMALE	Stage I	T1	M0	N0
TCGA-55-8090	>65	FEMALE	Stage I	T1	M0	N0
TCGA-50-8457	>65	FEMALE	Stage I	T1	M0	N0
TCGA-50-8460	<=65	MALE	Stage I	T1	M0	N0
TCGA-91-6828	<=65	MALE	Stage I	T1	M0	N0
TCGA-44-6144	<=65	MALE	Stage I	T1	M0	N0
TCGA-67-6216	<=65	MALE	Stage I	T1	M0	N0
TCGA-99-8028	>65	MALE	Stage I	T1	M0	N0
TCGA-99-8032	>65	MALE	Stage I	T1	M0	N0
TCGA-55-8089	>65	MALE	Stage I	T1	M0	N0
TCGA-97-A4M6	>65	MALE	Stage I	T1	M0	N0
TCGA-69-8255	>65	MALE	Stage I	T1	M0	N0
TCGA-MN-A4N5	>65	MALE	Stage I	T1	M0	N0
TCGA-97-A4M2	>65	MALE	Stage I	T1	M0	N0
TCGA-97-A4M1	>65	MALE	Stage I	T1	M0	N0
TCGA-69-7980	<=65	FEMALE	Stage I	T1	M0	N0
TCGA-55-8206	<=65	FEMALE	Stage I	T1	M0	N0
TCGA-44-3398	<=65	FEMALE	Stage I	T1	M0	N0
TCGA-97-A4M5	<=65	FEMALE	Stage I	T1	M0	N0
TCGA-55-8085	<=65	FEMALE	Stage I	T1	M0	N0
TCGA-44-7672	<=65	FEMALE	Stage I	T1	M0	N0
TCGA-69-7764	>65	FEMALE	Stage I	T1	M0	N0
TCGA-69-7763	>65	FEMALE	Stage I	T1	M0	N0
TCGA-97-A4M7	>65	FEMALE	Stage I	T1	M0	N0
TCGA-86-8669	>65	FEMALE	Stage I	T1	M0	N0
TCGA-73-7498	>65	FEMALE	Stage I	T1	M0	N0
TCGA-55-8208	>65	FEMALE	Stage I	T1	M0	N0
TCGA-55-7995	>65	FEMALE	Stage I	T1	M0	N0
TCGA-MN-A4N4	>65	FEMALE	Stage I	T1	M0	N0
TCGA-44-A4SS	>65	FEMALE	Stage I	T1	M0	N0
TCGA-55-8203	>65	FEMALE	Stage I	T1	M0	N0
TCGA-55-A57B	>65	FEMALE	Stage I	T1	M0	N0
TCGA-S2-AA1A	<=65	MALE	Stage I	T1	M0	N0
TCGA-97-A4M3	<=65	MALE	Stage I	T1	M0	N0
TCGA-NJ-A4YQ	<=65	MALE	Stage I	T1	M0	N0
TCGA-55-7281	>65	MALE	Stage I	T1	M0	N0
TCGA-86-8668	>65	MALE	Stage I	T1	M0	N0
TCGA-4B-A93V	>65	MALE	Stage I	T1	M0	N0
TCGA-86-7953	>65	MALE	Stage I	T1	M0	N0
TCGA-91-6840	>65	MALE	Stage I	T1	M0	N0
TCGA-55-1592	>65	FEMALE	Stage I	T2	M0	N0
TCGA-50-5049	<=65	MALE	Stage I	T2	M0	N0
TCGA-55-6986	<=65	FEMALE	Stage I	T2	M0	N0
TCGA-05-4405	<=65	FEMALE	Stage I	T2	M0	N0
TCGA-50-5066	<=65	FEMALE	Stage I	T2	M0	N0
TCGA-78-7542	<=65	FEMALE	Stage I	T2	M0	N0
TCGA-05-4390	<=65	FEMALE	Stage I	T2	M0	N0
TCGA-05-4403	<=65	FEMALE	Stage I	T2	M0	N0
TCGA-78-7143	<=65	FEMALE	Stage I	T2	M0	N0
TCGA-62-A46P	<=65	FEMALE	Stage I	T2	M0	N0
TCGA-05-4430	<=65	FEMALE	Stage I	T2	M0	N0
TCGA-67-3772	<=65	FEMALE	Stage I	T2	M0	N0
TCGA-50-5931	<=65	FEMALE	Stage I	T2	M0	N0
TCGA-44-2668	<=65	FEMALE	Stage I	T2	M0	N0
TCGA-44-3917	<=65	FEMALE	Stage I	T2	M0	N0
TCGA-62-A46R	<=65	FEMALE	Stage I	T2	M0	N0
TCGA-71-8520	<=65	FEMALE	Stage I	T2	M0	N0
TCGA-71-6725	>65	FEMALE	Stage I	T2	M0	N0
TCGA-75-5147	>65	FEMALE	Stage I	T2	M0	N0
TCGA-50-6592	>65	FEMALE	Stage I	T2	M0	N0
TCGA-64-5781	>65	FEMALE	Stage I	T2	M0	N0
TCGA-38-4630	>65	FEMALE	Stage I	T2	M0	N0
TCGA-75-7031	>65	FEMALE	Stage I	T2	M0	N0
TCGA-75-5146	>65	FEMALE	Stage I	T2	M0	N0
TCGA-75-7027	>65	FEMALE	Stage I	T2	M0	N0
TCGA-78-7540	>65	FEMALE	Stage I	T2	M0	N0
TCGA-67-3774	>65	FEMALE	Stage I	T2	M0	N0
TCGA-MP-A5C7	>65	FEMALE	Stage I	T2	M0	N0
TCGA-64-5778	>65	FEMALE	Stage I	T2	M0	N0
TCGA-05-4426	>65	FEMALE	Stage I	T2	M0	N0
TCGA-38-4631	>65	FEMALE	Stage I	T2	M0	N0
TCGA-44-2662	>65	FEMALE	Stage I	T2	M0	N0
TCGA-35-3615	>65	FEMALE	Stage I	T2	M0	N0
TCGA-05-4249	>65	FEMALE	Stage I	T2	M0	N0
TCGA-78-7152	>65	FEMALE	Stage I	T2	M0	N0
TCGA-44-2656	>65	FEMALE	Stage I	T2	M0	N0
TCGA-75-5122	>65	FEMALE	Stage I	T2	M0	N0
TCGA-64-5774	unknow	FEMALE	Stage I	T2	M0	N0
TCGA-05-4420	unknow	FEMALE	Stage I	T2	M0	N0
TCGA-NJ-A4YG	<=65	MALE	Stage I	T2	M0	N0
TCGA-50-5939	<=65	MALE	Stage I	T2	M0	N0
TCGA-78-8662	<=65	MALE	Stage I	T2	M0	N0
TCGA-78-7537	<=65	MALE	Stage I	T2	M0	N0
TCGA-50-6597	<=65	MALE	Stage I	T2	M0	N0
TCGA-44-2666	<=65	MALE	Stage I	T2	M0	N0
TCGA-05-4382	<=65	MALE	Stage I	T2	M0	N0
TCGA-78-7163	<=65	MALE	Stage I	T2	M0	N0
TCGA-05-4417	<=65	MALE	Stage I	T2	M0	N0
TCGA-05-4433	<=65	MALE	Stage I	T2	M0	N0
TCGA-62-A46V	<=65	MALE	Stage I	T2	M0	N0
TCGA-67-3773	<=65	MALE	Stage I	T2	M0	N0
TCGA-75-7025	<=65	MALE	Stage I	T2	M0	N0
TCGA-55-6972	<=65	MALE	Stage I	T2	M0	N0
TCGA-80-5611	<=65	MALE	Stage I	T2	M0	N0
TCGA-05-4422	>65	MALE	Stage I	T2	M0	N0
TCGA-62-A46S	>65	MALE	Stage I	T2	M0	N0
TCGA-75-6206	>65	MALE	Stage I	T2	M0	N0
TCGA-05-4410	>65	MALE	Stage I	T2	M0	N0
TCGA-78-7633	>65	MALE	Stage I	T2	M0	N0
TCGA-78-7153	>65	MALE	Stage I	T2	M0	N0
TCGA-49-4501	>65	MALE	Stage I	T2	M0	N0
TCGA-86-8673	>65	MALE	Stage I	T2	M0	N0
TCGA-50-6590	>65	MALE	Stage I	T2	M0	N0
TCGA-86-7954	>65	MALE	Stage I	T2	M0	N0
TCGA-86-8075	>65	MALE	Stage I	T2	M0	N0
TCGA-MP-A4SV	>65	MALE	Stage I	T2	M0	N0
TCGA-73-4658	>65	MALE	Stage I	T2	M0	N0
TCGA-78-7155	>65	MALE	Stage I	T2	M0	N0
TCGA-75-6211	>65	MALE	Stage I	T2	M0	N0
TCGA-78-7535	>65	MALE	Stage I	T2	M0	N0
TCGA-55-6969	>65	MALE	Stage I	T2	M0	N0
TCGA-62-A46O	unknow	MALE	Stage I	T2	M0	N0
TCGA-55-8616	<=65	FEMALE	Stage I	T2	M0	N0
TCGA-55-7574	<=65	FEMALE	Stage I	T2	M0	N0
TCGA-55-7576	<=65	FEMALE	Stage I	T2	M0	N0
TCGA-97-A4LX	<=65	FEMALE	Stage I	T2	M0	N0
TCGA-86-8073	<=65	FEMALE	Stage I	T2	M0	N0
TCGA-67-6215	<=65	FEMALE	Stage I	T2	M0	N0
TCGA-97-A4M0	<=65	FEMALE	Stage I	T2	M0	N0
TCGA-NJ-A4YP	<=65	FEMALE	Stage I	T2	M0	N0
TCGA-75-6205	<=65	FEMALE	Stage I	T2	M0	N0
TCGA-95-7948	>65	FEMALE	Stage I	T2	M0	N0
TCGA-44-7671	>65	FEMALE	Stage I	T2	M0	N0
TCGA-55-A493	>65	FEMALE	Stage I	T2	M0	N0
TCGA-44-8117	>65	FEMALE	Stage I	T2	M0	N0
TCGA-86-A4P7	unknow	FEMALE	Stage I	T2	M0	N0
TCGA-44-4112	unknow	FEMALE	Stage I	T2	M0	N0
TCGA-69-7973	<=65	MALE	Stage I	T2	M0	N0
TCGA-86-7955	<=65	MALE	Stage I	T2	M0	N0
TCGA-44-8120	<=65	MALE	Stage I	T2	M0	N0
TCGA-38-4625	<=65	MALE	Stage I	T2	M0	N0
TCGA-44-7661	<=65	MALE	Stage I	T2	M0	N0
TCGA-44-A47B	<=65	MALE	Stage I	T2	M0	N0
TCGA-97-8177	>65	MALE	Stage I	T2	M0	N0
TCGA-86-8358	>65	MALE	Stage I	T2	M0	N0
TCGA-73-7499	>65	MALE	Stage I	T2	M0	N0
TCGA-97-8175	>65	MALE	Stage I	T2	M0	N0
TCGA-86-8585	>65	MALE	Stage I	T2	M0	N0
TCGA-05-5715	unknow	MALE	Stage I	T2	M0	N0
TCGA-73-4677	>65	MALE	unknow	T2	M0	N0
TCGA-MP-A4TF	<=65	FEMALE	Stage II	T2	M0	N0
TCGA-86-8280	<=65	FEMALE	Stage II	T2	M0	N0
TCGA-55-7910	>65	FEMALE	Stage II	T2	M0	N0
TCGA-86-7713	>65	FEMALE	Stage II	T2	M0	N0
TCGA-55-A48Y	<=65	MALE	Stage II	T2	M0	N0
TCGA-86-A4D0	<=65	MALE	Stage II	T2	M0	N0
TCGA-55-8205	<=65	MALE	Stage II	T2	M0	N0
TCGA-78-7539	>65	MALE	Stage II	T2	M0	N0
TCGA-97-8174	>65	MALE	Stage II	T2	M0	N0
TCGA-64-1678	<=65	MALE	unknow	T2	M0	N0
TCGA-38-4626	<=65	MALE	unknow	T2	M0	N0
TCGA-86-8672	<=65	FEMALE	Stage II	T3	M0	N0
TCGA-78-8648	<=65	FEMALE	Stage II	T3	M0	N0
TCGA-44-8119	>65	FEMALE	Stage II	T3	M0	N0
TCGA-62-8397	>65	FEMALE	Stage II	T3	M0	N0
TCGA-05-4424	>65	FEMALE	Stage II	T3	M0	N0
TCGA-69-7760	<=65	MALE	Stage II	T3	M0	N0
TCGA-86-A4JF	<=65	MALE	Stage II	T3	M0	N0
TCGA-38-4629	<=65	MALE	Stage II	T3	M0	N0
TCGA-75-7030	<=65	MALE	Stage II	T3	M0	N0
TCGA-78-7161	<=65	MALE	Stage II	T3	M0	N0
TCGA-73-A9RS	>65	MALE	Stage II	T3	M0	N0
TCGA-62-A472	>65	MALE	Stage II	T3	M0	N0
TCGA-69-A59K	>65	MALE	Stage II	T3	M0	N0
TCGA-62-8395	unknow	MALE	Stage II	T3	M0	N0
TCGA-67-4679	>65	MALE	unknow	T3	M0	N0
TCGA-99-7458	<=65	FEMALE	Stage III	T4	M0	N0
TCGA-64-5775	>65	FEMALE	Stage III	T4	M0	N0
TCGA-86-8056	>65	MALE	Stage III	T4	M0	N0
TCGA-53-7813	>65	MALE	Stage III	T4	M0	N0
TCGA-78-7149	>65	MALE	Stage III	T4	M0	N0
TCGA-55-6968	>65	FEMALE	Stage IV	T1	M1	N0
TCGA-73-4666	>65	MALE	Stage IV	T1	M1	N0
TCGA-53-7624	<=65	FEMALE	Stage IV	T2	M1	N0
TCGA-50-6591	<=65	MALE	Stage IV	T2	M1	N0
TCGA-73-4670	<=65	MALE	Stage IV	T2	M1	N0
TCGA-86-7701	<=65	MALE	Stage IV	T2	M1	N0
TCGA-MP-A4T7	<=65	MALE	Stage IV	T2	M1	N0
TCGA-78-7167	>65	MALE	Stage IV	T2	M1	N0
TCGA-05-4425	>65	MALE	Stage IV	T2	M1	N0
TCGA-55-8094	>65	FEMALE	Stage IV	T2	M1	N0
TCGA-97-7553	<=65	FEMALE	Stage I	T1	unknow	N0
TCGA-49-4488	<=65	FEMALE	Stage I	T1	unknow	N0
TCGA-49-AARR	<=65	FEMALE	Stage I	T1	unknow	N0
TCGA-49-AARN	<=65	FEMALE	Stage I	T1	unknow	N0
TCGA-49-AARE	>65	FEMALE	Stage I	T1	unknow	N0
TCGA-44-6776	>65	FEMALE	Stage I	T1	unknow	N0
TCGA-49-AAR0	>65	FEMALE	Stage I	T1	unknow	N0
TCGA-50-5946	>65	FEMALE	Stage I	T1	unknow	N0
TCGA-O1-A52J	unknow	FEMALE	Stage I	T1	unknow	N0
TCGA-44-6778	>65	MALE	Stage I	T1	unknow	N0
TCGA-97-8552	>65	FEMALE	Stage I	T1	unknow	N0
TCGA-55-7725	<=65	FEMALE	Stage I	T1	unknow	N0
TCGA-55-7911	<=65	FEMALE	Stage I	T1	unknow	N0
TCGA-55-8621	<=65	FEMALE	Stage I	T1	unknow	N0
TCGA-55-8507	<=65	FEMALE	Stage I	T1	unknow	N0
TCGA-55-7570	>65	FEMALE	Stage I	T1	unknow	N0
TCGA-93-7348	>65	FEMALE	Stage I	T1	unknow	N0
TCGA-95-7043	>65	FEMALE	Stage I	T1	unknow	N0
TCGA-97-7938	>65	FEMALE	Stage I	T1	unknow	N0
TCGA-L9-A443	<=65	MALE	Stage I	T1	unknow	N0
TCGA-93-7347	<=65	MALE	Stage I	T1	unknow	N0
TCGA-J2-A4AD	<=65	MALE	Stage I	T1	unknow	N0
TCGA-91-8497	<=65	MALE	Stage I	T1	unknow	N0
TCGA-55-8097	<=65	MALE	Stage I	T1	unknow	N0
TCGA-49-AARO	<=65	MALE	Stage I	T1	unknow	N0
TCGA-55-A492	<=65	MALE	Stage I	T1	unknow	N0
TCGA-L9-A444	<=65	MALE	Stage I	T1	unknow	N0
TCGA-44-A4SU	>65	MALE	Stage I	T1	unknow	N0
TCGA-J2-A4AE	>65	MALE	Stage I	T1	unknow	N0
TCGA-93-A4JO	>65	MALE	Stage I	T1	unknow	N0
TCGA-NJ-A55R	<=65	FEMALE	Stage I	T1	unknow	N0
TCGA-55-6543	<=65	FEMALE	Stage I	T1	unknow	N0
TCGA-55-A491	<=65	FEMALE	Stage I	T1	unknow	N0
TCGA-55-7903	<=65	FEMALE	Stage I	T1	unknow	N0
TCGA-55-8299	<=65	FEMALE	Stage I	T1	unknow	N0
TCGA-55-7573	<=65	FEMALE	Stage I	T1	unknow	N0
TCGA-55-A4DF	<=65	FEMALE	Stage I	T1	unknow	N0
TCGA-J2-A4AG	>65	FEMALE	Stage I	T1	unknow	N0
TCGA-44-7659	>65	FEMALE	Stage I	T1	unknow	N0
TCGA-91-8499	<=65	MALE	Stage I	T1	unknow	N0
TCGA-55-7913	<=65	MALE	Stage I	T1	unknow	N0
TCGA-55-7726	<=65	MALE	Stage I	T1	unknow	N0
TCGA-55-A4DG	>65	MALE	Stage I	T1	unknow	N0
TCGA-49-AARQ	<=65	FEMALE	Stage I	T2	unknow	N0
TCGA-91-6836	<=65	FEMALE	Stage I	T2	unknow	N0
TCGA-97-7547	<=65	FEMALE	Stage I	T2	unknow	N0
TCGA-55-8091	<=65	FEMALE	Stage I	T2	unknow	N0
TCGA-97-7552	<=65	FEMALE	Stage I	T2	unknow	N0
TCGA-55-6971	>65	FEMALE	Stage I	T2	unknow	N0
TCGA-44-7660	unknow	FEMALE	Stage I	T2	unknow	N0
TCGA-55-6642	unknow	FEMALE	Stage I	T2	unknow	N0
TCGA-91-6847	<=65	MALE	Stage I	T2	unknow	N0
TCGA-44-A479	<=65	MALE	Stage I	T2	unknow	N0
TCGA-55-6985	<=65	MALE	Stage I	T2	unknow	N0
TCGA-91-6829	>65	MALE	Stage I	T2	unknow	N0
TCGA-55-8302	>65	MALE	Stage I	T2	unknow	N0
TCGA-91-6831	unknow	MALE	Stage I	T2	unknow	N0
TCGA-55-8096	<=65	FEMALE	Stage I	T2	unknow	N0
TCGA-55-8204	<=65	FEMALE	Stage I	T2	unknow	N0
TCGA-44-7662	<=65	FEMALE	Stage I	T2	unknow	N0
TCGA-55-8514	>65	FEMALE	Stage I	T2	unknow	N0
TCGA-55-8510	>65	FEMALE	Stage I	T2	unknow	N0
TCGA-55-8614	>65	FEMALE	Stage I	T2	unknow	N0
TCGA-55-7724	>65	FEMALE	Stage I	T2	unknow	N0
TCGA-55-8087	<=65	MALE	Stage I	T2	unknow	N0
TCGA-55-7815	<=65	MALE	Stage I	T2	unknow	N0
TCGA-55-8511	<=65	MALE	Stage I	T2	unknow	N0
TCGA-44-A47A	<=65	MALE	Stage I	T2	unknow	N0
TCGA-55-A494	<=65	MALE	Stage I	T2	unknow	N0
TCGA-97-7937	<=65	MALE	Stage I	T2	unknow	N0
TCGA-55-8301	>65	MALE	Stage I	T2	unknow	N0
TCGA-L9-A8F4	>65	MALE	Stage I	T2	unknow	N0
TCGA-93-8067	>65	MALE	Stage I	T2	unknow	N0
TCGA-44-6775	unknow	MALE	Stage I	T2	unknow	N0
TCGA-55-6978	<=65	MALE	Stage II	T2	unknow	N0
TCGA-91-A4BC	<=65	MALE	Stage II	T2	unknow	N0
TCGA-55-A490	>65	MALE	Stage II	T2	unknow	N0
TCGA-MP-A4TE	>65	MALE	Stage II	T2	unknow	N0
TCGA-91-7771	<=65	FEMALE	Stage II	T3	unknow	N0
TCGA-55-8506	<=65	FEMALE	Stage II	T3	unknow	N0
TCGA-95-7039	<=65	FEMALE	Stage II	T3	unknow	N0
TCGA-55-8092	>65	FEMALE	Stage II	T3	unknow	N0
TCGA-49-6767	<=65	MALE	Stage II	T3	unknow	N0
TCGA-49-AAR9	<=65	MALE	Stage II	T3	unknow	N0
TCGA-J2-8194	>65	MALE	Stage II	T3	unknow	N0
TCGA-44-7667	>65	MALE	Stage II	T3	unknow	N0
TCGA-55-7284	>65	MALE	Stage II	T3	unknow	N0
TCGA-55-7994	>65	MALE	Stage II	T3	unknow	N0
TCGA-69-7765	<=65	MALE	unknow	T4	unknow	N0
TCGA-44-5644	<=65	FEMALE	Stage I	T2	unknow	N0
TCGA-78-8640	>65	FEMALE	Stage II	T1	M0	N1
TCGA-53-7626	>65	MALE	Stage II	T1	M0	N1
TCGA-50-5055	>65	MALE	Stage II	T1	M0	N1
TCGA-44-2659	>65	FEMALE	Stage II	T1	M0	N1
TCGA-55-5899	>65	MALE	unknow	T1	M0	N1
TCGA-38-4627	<=65	FEMALE	Stage II	T1	M0	N1
TCGA-44-7670	>65	FEMALE	Stage II	T1	M0	N1
TCGA-05-5428	>65	FEMALE	Stage II	T1	M0	N1
TCGA-55-A48X	>65	FEMALE	Stage II	T1	M0	N1
TCGA-86-8074	>65	FEMALE	Stage II	T1	M0	N1
TCGA-86-6851	unknow	MALE	Stage II	T1	M0	N1
TCGA-49-4506	<=65	FEMALE	Stage II	T2	M0	N1
TCGA-49-4505	<=65	FEMALE	Stage II	T2	M0	N1
TCGA-78-7147	<=65	FEMALE	Stage II	T2	M0	N1
TCGA-05-4397	<=65	FEMALE	Stage II	T2	M0	N1
TCGA-55-6975	<=65	FEMALE	Stage II	T2	M0	N1
TCGA-38-4628	<=65	FEMALE	Stage II	T2	M0	N1
TCGA-49-4510	>65	FEMALE	Stage II	T2	M0	N1
TCGA-67-3776	>65	FEMALE	Stage II	T2	M0	N1
TCGA-55-1596	>65	FEMALE	Stage II	T2	M0	N1
TCGA-05-4432	>65	FEMALE	Stage II	T2	M0	N1
TCGA-62-A46U	>65	FEMALE	Stage II	T2	M0	N1
TCGA-MP-A4SW	>65	FEMALE	Stage II	T2	M0	N1
TCGA-MP-A4SY	>65	FEMALE	Stage II	T2	M0	N1
TCGA-55-6979	>65	FEMALE	Stage II	T2	M0	N1
TCGA-05-5423	>65	FEMALE	Stage II	T2	M0	N1
TCGA-78-7150	>65	FEMALE	Stage II	T2	M0	N1
TCGA-55-6982	>65	FEMALE	Stage II	T2	M0	N1
TCGA-73-4668	>65	FEMALE	Stage II	T2	M0	N1
TCGA-78-8660	<=65	MALE	Stage II	T2	M0	N1
TCGA-50-5932	<=65	MALE	Stage II	T2	M0	N1
TCGA-75-5125	<=65	MALE	Stage II	T2	M0	N1
TCGA-05-4427	<=65	MALE	Stage II	T2	M0	N1
TCGA-78-7148	>65	MALE	Stage II	T2	M0	N1
TCGA-80-5607	>65	MALE	Stage II	T2	M0	N1
TCGA-44-2665	>65	MALE	Stage II	T2	M0	N1
TCGA-55-6984	>65	MALE	Stage II	T2	M0	N1
TCGA-64-5815	>65	MALE	Stage II	T2	M0	N1
TCGA-75-6212	>65	MALE	Stage II	T2	M0	N1
TCGA-78-7166	>65	MALE	Stage II	T2	M0	N1
TCGA-MP-A4T4	>65	MALE	Stage II	T2	M0	N1
TCGA-50-5045	>65	FEMALE	unknow	T2	M0	N1
TCGA-L9-A743	<=65	FEMALE	Stage II	T2	M0	N1
TCGA-MP-A4TI	<=65	FEMALE	Stage II	T2	M0	N1
TCGA-95-8494	<=65	FEMALE	Stage II	T2	M0	N1
TCGA-86-8674	<=65	FEMALE	Stage II	T2	M0	N1
TCGA-86-7711	<=65	FEMALE	Stage II	T2	M0	N1
TCGA-95-7562	<=65	FEMALE	Stage II	T2	M0	N1
TCGA-86-8055	<=65	FEMALE	Stage II	T2	M0	N1
TCGA-95-A4VN	>65	FEMALE	Stage II	T2	M0	N1
TCGA-73-4676	>65	FEMALE	Stage II	T2	M0	N1
TCGA-86-6562	unknow	FEMALE	Stage II	T2	M0	N1
TCGA-86-8279	<=65	MALE	Stage II	T2	M0	N1
TCGA-MN-A4N1	<=65	MALE	Stage II	T2	M0	N1
TCGA-L9-A7SV	>65	MALE	Stage II	T2	M0	N1
TCGA-67-6217	unknow	MALE	Stage II	T2	M0	N1
TCGA-95-7567	<=65	FEMALE	Stage II	T2	M0	N1
TCGA-05-5425	>65	FEMALE	Stage II	T2	M0	N1
TCGA-62-A471	unknow	FEMALE	Stage II	T2	M0	N1
TCGA-44-A47F	<=65	MALE	Stage II	T2	M0	N1
TCGA-86-8671	>65	MALE	Stage II	T2	M0	N1
TCGA-49-4507	<=65	FEMALE	Stage III	T3	M0	N1
TCGA-73-4675	>65	FEMALE	Stage III	T3	M0	N1
TCGA-05-4250	<=65	MALE	Stage III	T3	M0	N1
TCGA-NJ-A7XG	<=65	FEMALE	Stage III	T4	M0	N1
TCGA-05-4396	<=65	MALE	Stage III	T4	M0	N1
TCGA-50-5044	<=65	MALE	Stage III	T4	M0	N1
TCGA-38-4632	<=65	FEMALE	Stage IV	T2	M1	N1
TCGA-78-7145	>65	FEMALE	Stage IV	T4	M1	N1
TCGA-78-7156	>65	MALE	Stage IV	T4	M1	N1
TCGA-05-4434	>65	MALE	Stage IV	T4	M1	N1
TCGA-55-8620	<=65	FEMALE	Stage IV	T1	M1	N1
TCGA-55-8512	>65	FEMALE	Stage IV	T1	M1	N1
TCGA-49-AAQV	>65	MALE	Stage II	T1	unknow	N1
TCGA-91-6830	<=65	FEMALE	Stage II	T1	unknow	N1
TCGA-69-8253	>65	MALE	Stage II	T1	unknow	N1
TCGA-91-A4BD	>65	FEMALE	Stage II	T1	unknow	N1
TCGA-55-7914	>65	FEMALE	Stage II	T1	unknow	N1
TCGA-44-7669	>65	MALE	Stage II	T1	unknow	N1
TCGA-L9-A50W	>65	MALE	Stage II	T1	unknow	N1
TCGA-49-AAR3	>65	FEMALE	Stage II	T2	unknow	N1
TCGA-44-6779	>65	FEMALE	Stage II	T2	unknow	N1
TCGA-MP-A4TK	>65	FEMALE	Stage II	T2	unknow	N1
TCGA-50-5068	<=65	MALE	Stage II	T2	unknow	N1
TCGA-J2-8192	<=65	FEMALE	Stage II	T2	unknow	N1
TCGA-49-6744	>65	FEMALE	Stage II	T2	unknow	N1
TCGA-55-7907	>65	MALE	Stage II	T2	unknow	N1
TCGA-55-6712	>65	MALE	Stage II	T2	unknow	N1
TCGA-69-7978	>65	MALE	Stage II	T2	unknow	N1
TCGA-55-7227	>65	FEMALE	Stage III	T3	unknow	N1
TCGA-55-6981	<=65	FEMALE	Stage III	T1	M0	N2
TCGA-44-6774	<=65	FEMALE	Stage III	T1	M0	N2
TCGA-64-1679	<=65	FEMALE	Stage III	T1	M0	N2
TCGA-MP-A4TC	>65	FEMALE	Stage III	T1	M0	N2
TCGA-50-6593	>65	MALE	Stage III	T1	M0	N2
TCGA-86-7714	<=65	MALE	Stage III	T1	M0	N2
TCGA-78-7146	<=65	FEMALE	Stage III	T2	M0	N2
TCGA-62-8402	<=65	FEMALE	Stage III	T2	M0	N2
TCGA-73-4659	<=65	FEMALE	Stage III	T2	M0	N2
TCGA-44-3396	<=65	FEMALE	Stage III	T2	M0	N2
TCGA-35-5375	<=65	FEMALE	Stage III	T2	M0	N2
TCGA-62-8399	<=65	FEMALE	Stage III	T2	M0	N2
TCGA-75-6203	<=65	FEMALE	Stage III	T2	M0	N2
TCGA-64-1677	<=65	FEMALE	Stage III	T2	M0	N2
TCGA-55-1594	>65	FEMALE	Stage III	T2	M0	N2
TCGA-78-7220	>65	FEMALE	Stage III	T2	M0	N2
TCGA-05-5420	>65	FEMALE	Stage III	T2	M0	N2
TCGA-MP-A4T8	>65	FEMALE	Stage III	T2	M0	N2
TCGA-75-6214	>65	FEMALE	Stage III	T2	M0	N2
TCGA-62-8398	>65	FEMALE	Stage III	T2	M0	N2
TCGA-50-5930	<=65	MALE	Stage III	T2	M0	N2
TCGA-05-4384	<=65	MALE	Stage III	T2	M0	N2
TCGA-MP-A4TD	<=65	MALE	Stage III	T2	M0	N2
TCGA-50-5072	<=65	MALE	Stage III	T2	M0	N2
TCGA-62-A46Y	>65	MALE	Stage III	T2	M0	N2
TCGA-50-6595	>65	MALE	Stage III	T2	M0	N2
TCGA-75-6207	>65	MALE	Stage III	T2	M0	N2
TCGA-78-7536	>65	MALE	Stage III	T2	M0	N2
TCGA-05-4245	>65	MALE	Stage III	T2	M0	N2
TCGA-50-5051	>65	MALE	Stage III	T2	M0	N2
TCGA-50-5941	>65	FEMALE	Stage III	T2	M0	N2
TCGA-49-6745	<=65	MALE	Stage III	T2	M0	N2
TCGA-97-7554	unknow	MALE	Stage III	T2	M0	N2
TCGA-44-5643	<=65	FEMALE	Stage III	T2	M0	N2
TCGA-95-A4VK	>65	MALE	Stage III	T2	M0	N2
TCGA-78-7154	<=65	FEMALE	Stage III	T3	M0	N2
TCGA-49-4494	<=65	FEMALE	Stage III	T3	M0	N2
TCGA-50-6594	>65	FEMALE	Stage III	T3	M0	N2
TCGA-05-4418	>65	FEMALE	Stage III	T3	M0	N2
TCGA-99-8025	>65	FEMALE	Stage III	T3	M0	N2
TCGA-75-5126	<=65	MALE	Stage III	T3	M0	N2
TCGA-49-4490	<=65	MALE	Stage III	T3	M0	N2
TCGA-86-8359	<=65	MALE	Stage III	T3	M0	N2
TCGA-05-5429	>65	MALE	Stage III	T3	M0	N2
TCGA-05-4415	<=65	FEMALE	Stage III	T4	M0	N2
TCGA-78-7158	<=65	FEMALE	Stage III	T4	M0	N2
TCGA-50-5933	>65	FEMALE	Stage III	T4	M0	N2
TCGA-62-8394	>65	FEMALE	Stage III	T4	M0	N2
TCGA-05-4395	unknow	MALE	Stage III	T4	M0	N2
TCGA-05-4244	<=65	MALE	Stage IV	T2	M1	N2
TCGA-64-1680	>65	FEMALE	Stage IV	T2	M1	N2
TCGA-78-7160	<=65	FEMALE	Stage IV	T4	M1	N2
TCGA-97-8171	>65	FEMALE	Stage IV	T2	M1	N2
TCGA-L9-A5IP	>65	MALE	Stage IV	T3	M1	N2
TCGA-49-6761	>65	FEMALE	Stage III	T1	unknow	N2
TCGA-MP-A4T6	>65	FEMALE	Stage III	T1	unknow	N2
TCGA-49-6743	>65	MALE	Stage III	T1	unknow	N2
TCGA-55-8505	>65	FEMALE	Stage III	T1	unknow	N2
TCGA-55-7727	<=65	MALE	Stage III	T1	unknow	N2
TCGA-86-A4P8	<=65	MALE	Stage III	T1	unknow	N2
TCGA-91-6848	<=65	FEMALE	Stage III	T2	unknow	N2
TCGA-49-AAR4	>65	FEMALE	Stage III	T2	unknow	N2
TCGA-49-4512	>65	FEMALE	Stage III	T2	unknow	N2
TCGA-91-6849	>65	FEMALE	Stage III	T2	unknow	N2
TCGA-55-6970	>65	MALE	Stage III	T2	unknow	N2
TCGA-MP-A4T9	>65	MALE	Stage III	T2	unknow	N2
TCGA-69-7974	>65	FEMALE	Stage III	T2	unknow	N2
TCGA-55-7283	<=65	FEMALE	Stage III	T3	unknow	N2
TCGA-55-8615	<=65	FEMALE	Stage III	T3	unknow	N2
TCGA-38-6178	<=65	FEMALE	Stage III	T2	unknow	N2
TCGA-05-4398	>65	MALE	Stage III	T4	M0	N3
TCGA-55-A48Z	<=65	MALE	Stage III	T1	unknow	N3
TCGA-86-8281	<=65	FEMALE	Stage I	T1	M0	unknow
TCGA-78-7159	<=65	FEMALE	Stage I	T1	M0	unknow
TCGA-44-6147	<=65	MALE	Stage I	T1	M0	unknow
TCGA-44-2657	>65	MALE	Stage I	T2	M0	unknow
TCGA-05-4402	>65	FEMALE	Stage IV	T2	M1	unknow
TCGA-99-8033	<=65	MALE	Stage IV	unknow	M1	unknow
TCGA-93-A4JP	>65	MALE	Stage IV	unknow	unknow	unknow
TCGA-44-6777	<=65	FEMALE	Stage I	T2	unknow	unknow
TCGA-91-8496	>65	FEMALE	Stage I	T2	unknow	unknow
TCGA-55-7816	>65	MALE	Stage IV	unknow	unknow	unknow
TCGA-44-5645	<=65	FEMALE	Stage I	T1	unknow	unknow
TCGA-69-8254	>65	MALE	unknow	T2	unknow	unknow
